# Supplementary material for: Electrochemical activation strategies of a novel high entropy amorphous V-based cathode material for high-performance aqueous zinc-ion batteries
Source: Royal Society of Chemistry journal article supplement (doi:10.1039/d1ta05205e), 2021-01-01
Supplement: d1ta05205e1.pdf [file d1ta05205e1.pdf]

Electronic Supplementary Information

**Electrochemically Activation Strategies of A Novel High Entropy Amorphous V-based  
Cathode Material for High-performance Aqueous Zinc Ion Batteries**

Shangshang Zhang,<sup>a</sup> Zhenjiang Liu,<sup>a</sup> Lun Li,<sup>a</sup> Yudie Tang,<sup>a</sup> Shengkai Li,<sup>a</sup> Haitao Huang<sup>b</sup> and  
Haiyan Zhang<sup>a\*</sup>

<sup>a</sup> School of Materials and Energy, Guangdong University of Technology, Guangzhou, 510006,  
P. R. China.

<sup>b</sup> Department of Applied Physics and Materials Research Center, The Hong Kong Polytechnic  
University, Hong Kong SAR, P. R. China.

\* Corresponding author, E-mail: [hyzhang@gdut.edu.cn](mailto:hyzhang@gdut.edu.cn)

## Supplementary Figures

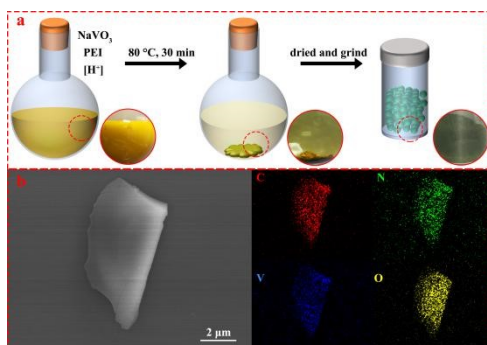

**Fig. S1** a) Schematic illustration of the synthesis. b) SEM and Elements-Mapping of  $V_xO_y@PEI$

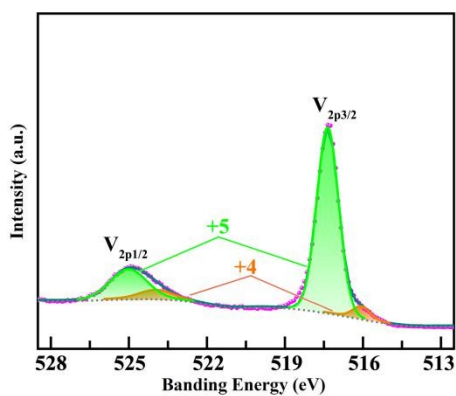

**Fig. S2** XPS of  $V_xO_y@PEI$  annealed under 600 °C for 180 min at air

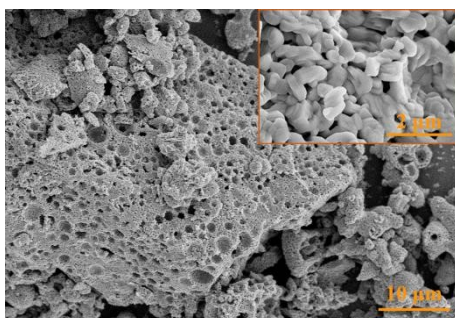

**Fig. S3** SEM of  $V_xO_y@PEI$  annealed under 600 °C for 180 min at air

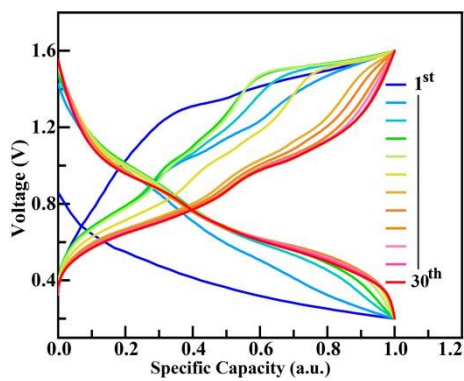

**Fig. S4** Normalization galvanostatic dis/charge profiles of  $V_xO_y@C$  under pre-activation stage at  $0.2 \text{ A}\cdot\text{g}^{-1}$ .

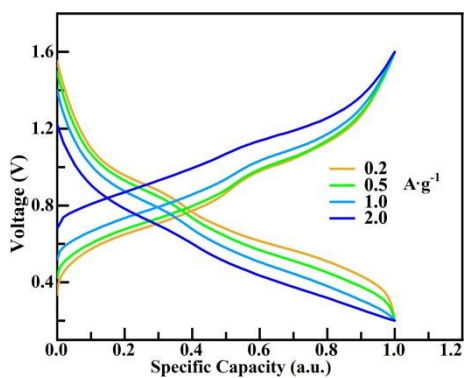

**Fig. S5** Normalization galvanostatic dis/charge profiles of  $V_xO_y@C$  at varying current density after 20 cycles activation at  $0.2 \text{ A}\cdot\text{g}^{-1}$ .

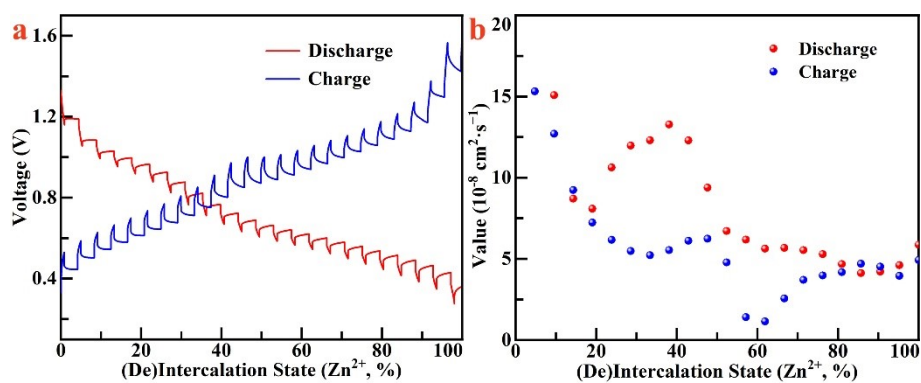

**Fig. S6** GITT measurements and (c) corresponding  $Zn^{2+}$  diffusion coefficient at  $50 \text{ mA}\cdot\text{g}^{-1}$ .

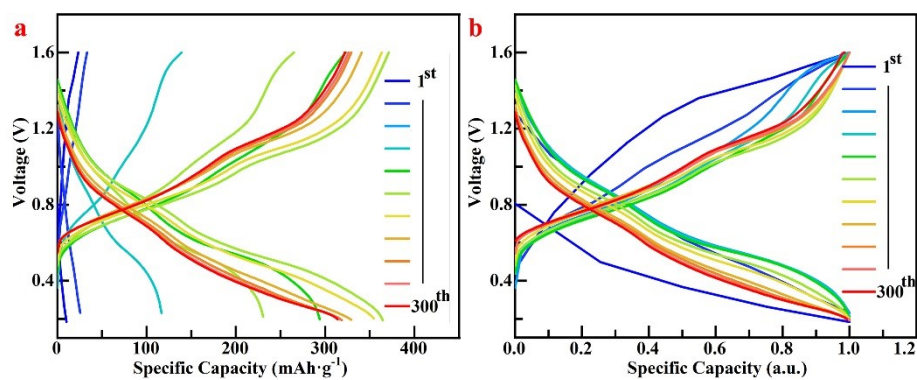

**Fig. S7** Galvanostatic dis/charge profiles and normalization galvanostatic dis/charge profiles of  $V_xO_y@C$  at  $1.0 \text{ A}\cdot\text{g}^{-1}$ .

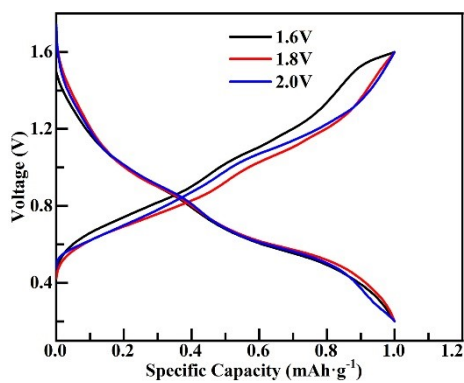

**Fig. S8** Normalization first galvanostatic dis/charge profiles of  $V_xO_y@C$  at  $0.5 \text{ A}\cdot\text{g}^{-1}$  after constant voltage charge.

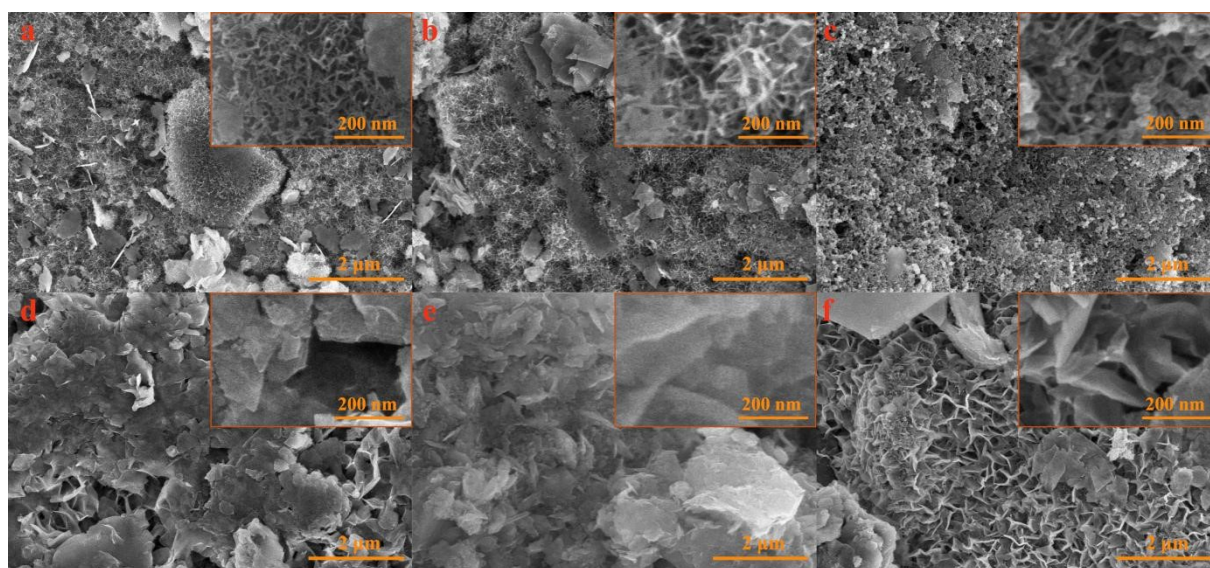

**Fig. S9** SEM of electrode for full charge or discharge. **a, d)** 10<sup>st</sup> cycle. **b, e)** 30<sup>th</sup> cycle. **c, f)** 50<sup>th</sup> cycle

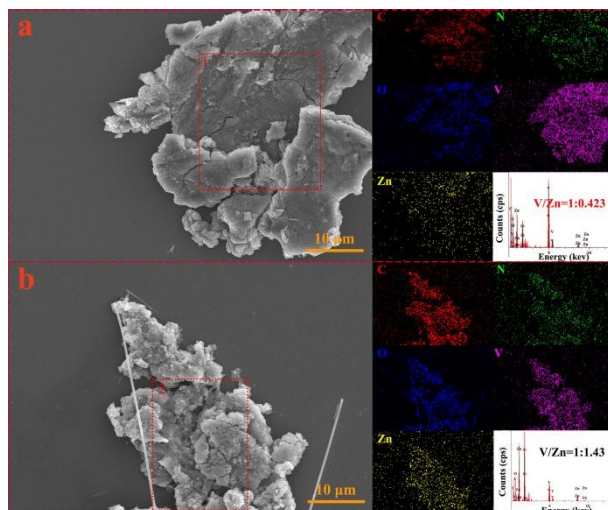

**Fig. S10** SEM - EDS of electrode for full charge or discharge after 50 cycles. **a)** full charge. **b)** full discharge.

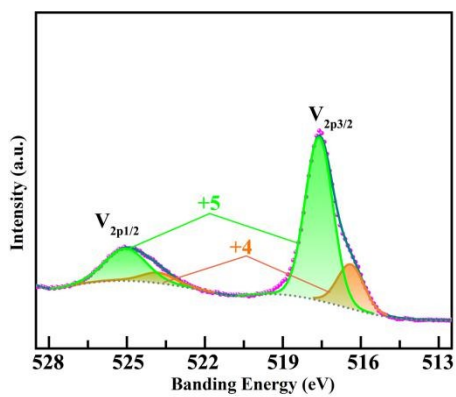

**Fig. S11** XPS of electrode after constant voltage charge at 1.8V for 2 hours.

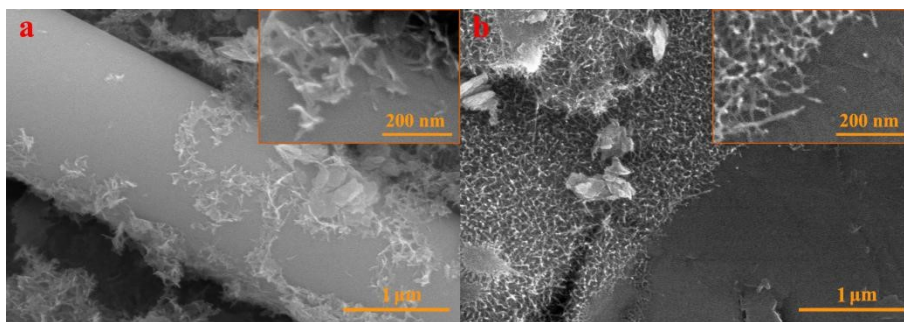

**Fig. S12** Distribution of amorphous vanadium oxide fibers on electrode after constant voltage charge at 1.8V for 2 hours. Surface of **a)** glass fiber and **b)** Ti foil.

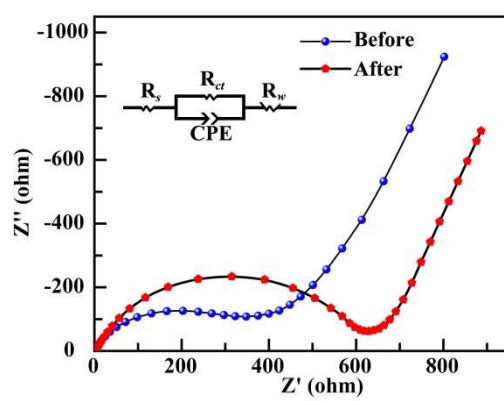

**Fig. S13** Nyquist plots of Zn//V<sub>x</sub>O<sub>y</sub>@C battery before or after activated.
